# Supplementary material for: Improving the extracellular electron transfer of Shewanella oneidensis MR-1 for enhanced bioelectricity production from biomass hydrolysate
Source: Royal Society of Chemistry journal article supplement (doi:10.1039/c7ra04106c), 2017-01-01
Supplement: c7ra04106c1.pdf [file c7ra04106c1.pdf]

*Supplementary Information*

**Improving the extracellular electron transfer of *Shewanella oneidensis* MR-1 for enhanced bioelectricity production from biomass hydrolysate**

Yan-Zhai Wang<sup>1,a</sup>, Yu Shen<sup>2,a</sup>, Lu Gao<sup>1</sup>, Zhi-Hong Liao<sup>1</sup>, Jian-Zhong Sun<sup>1</sup>, Yang-Chun Yong<sup>1,3\*</sup>

<sup>1</sup>*Biofuels Institute, School of the Environment, Jiangsu University, 301 Xuefu Road, Zhenjiang 212013, Jiangsu Province, China*

<sup>2</sup>*College of Environment and Resources, Chongqing Technology and Business University, and Chongqing Institute of Green and Intelligent Technology, Chinese Academy of Sciences, Chongqing 401122, China*

<sup>3</sup>*Jiangsu Key Laboratory of Chemical Pollution Control and Resources Reuse, Nanjing University of Science and Technology, Nanjing 210094, P.R. China*

<sup>a</sup>Equal contribution.

\* Corresponding author, E-mail: ycyong@ujs.edu.cn; Tel: +86-511-8878 6708, Fax: +86-511-8879 0955

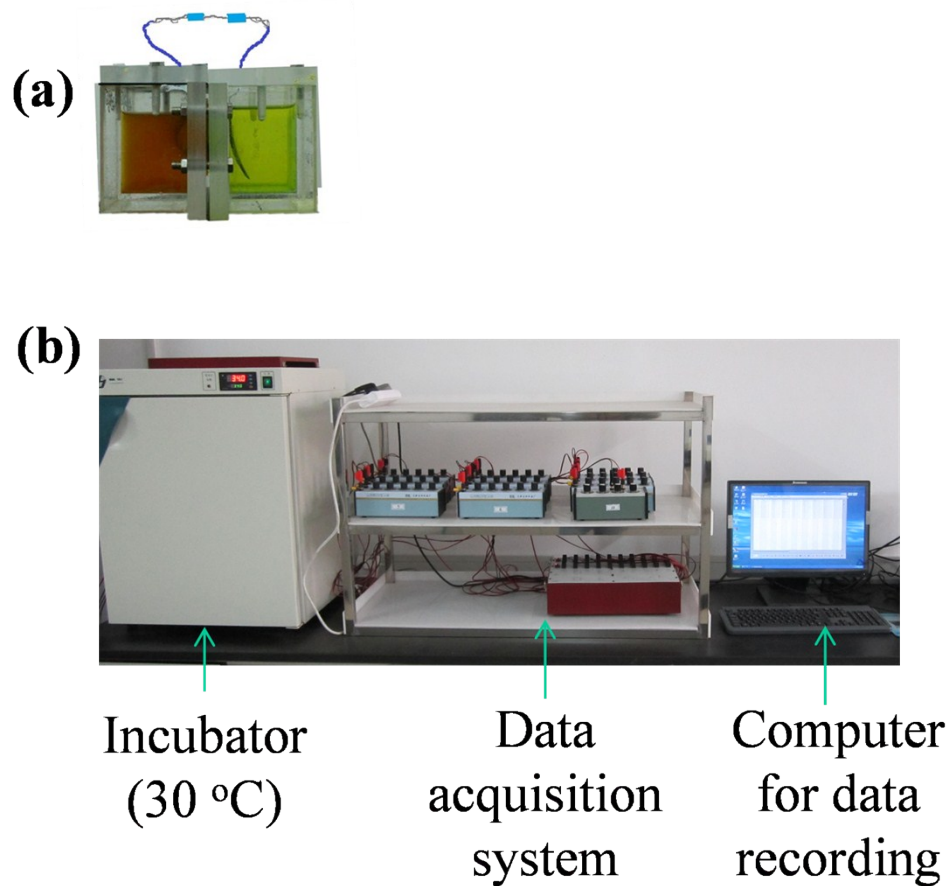

**Figure S1.** The photograph of (a) the dual-chamber MFC and (b) the whole testing facilities for MFC operation used in this study. The MFCs discharge was conducted in the incubator at 30 °C.

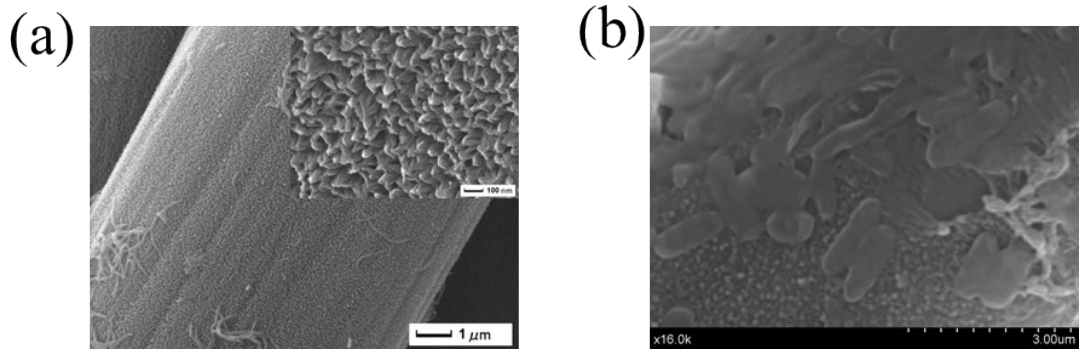

**Figure S2.** SEM images of carbon cloth modified with PANI nanowire array (a), inset is the magnified view of the vertically aligned PANI nanowire array on the carbon fiber. (b) SEM image of PANI modified carbon cloth after MFC discharge. This image showed the attached bacteria on the surface of the PANI nanowire array.
